# Supplementary material for: The impact of Cash transfer on Children’s Nutrition outcome in Humanitarian context of Somalia, Systematic review.
Source: Research Square preprint supplement (doi:10.21203/rs.3.rs-8273214/v1), 2026-01-30
Supplement: Supplementary file 1 [file 205abb9f1105e41e04b0fe80.xlsx]

## Sheet: RCT Studies
Citation	study	1. Was true randomization used for assignment of participants to treatment groups?	2. Was allocation to treatment groups concealed?	3. Were treatment groups similar at the baseline?	4. Were participants blind to treatment assignment?	5. Were those delivering treatment blind to treatment assignment?	6. Were outcomes assessors blind to treatment assignment?	7. Were treatment groups treated identically other than the intervention of interest?	8. Was follow up complete and if not, were differences between groups in terms of their follow up adequately described and analyzed?	9. Were participants analyzed in the groups to which they were randomized?	10. Were outcomes measured in the same way for treatment groups?	11. Were outcomes measured in a reliable way?	12. Was appropriate statistical analysis used?	13. Was the trial design appropriate, and any deviations from the standard RCT design (individual randomization, parallel groups) accounted for in the conduct and analysis of the trial?	Overall appraisal?	Risk of bias
34	Grijalva-Eternod CS, et al 2023	yes	unclear	yes	no	no	unclear	yes	yes	yes	yes	yes	yes	yes	include	low-moderate

## Sheet: Cluster RCT
Citattion	Study	Was randomisation of clusters used?	Was allocation of clusters concealed?	Were the clusters similar at baseline?	Were individual participants in clusters handled appropriately?	Was the sample size calculation appropriate including clustering?	Were if applicable clusters randomised after recruitment of participants?	Was blinding of outcome assessors done (if possible)?	Were the statistical analyses appropriate given clustering?	Was loss to follow-up and attrition accounted for?	Was intention‐to‐treat analysis used?	Were results reported for each cluster and participants in the study arms?	Were the clusters analysed in the groups to which they were randomised?	Was follow‑up complete enough and consistent for all clusters?	Were outcomes measured in the same way across clusters and arms?	C	Overall appraisal?	Risk of bias
30	Walton S., et al, 2025	yes	unclear	No	yes	unclear	yes	no	unclear	yes	unclear	yes	yes	unclear	yes	unclear	include	low-moderate

## Sheet: Quasi experimental study
Citation	Study	Is it clear in the study what is the ‘cause’ and what is the ‘effect’ (i.e. there is no confusion about which variable comes first)?	Were the participants included in any comparisons similar?	Were the participants included in any comparisons receiving similar treatment/care, other than the exposure or intervention of interest?	Was there a control group?	Were there multiple measurements of the outcome both pre and post the intervention/exposure?	Was follow up complete and if not, were differences between groups in terms of their follow up adequately described and analyzed?	Were the outcomes of participants included in any comparisons measured in the same way?	Were outcomes measured in a reliable way?	Was appropriate statistical analysis used?	overall appraisal?	Risk of bias
24	Ali, M.K, et al 2022	yes	yes	no	yes	yes	unclear	yes	yes	yes	include	low-moderate

## Sheet: Ramdomized impact evalaution
citation	study	1. Was true randomisation used for assignment of participants (or clusters) to intervention and control groups?	1. Was allocation to treatment and control groups concealed from those assigning participants and/or clusters?	1. Were baseline groups (or clusters) similar in key characteristics?	Were participants (or clusters) accounted for in the groups to which they were assigned	1. Were the outcomes measured in the same way for the groups (or clusters) and were outcome assessors blinded to group allocation?	1. Were follow‑up time, completeness of follow‑up (attrition), and handling of missing data adequately reported and similar across groups?	1. Was the trial design appropriate and execution satisfactory (e.g., cluster design if used, adjustment for clustering, control of contamination/spill‑over)?	1. Were statistical analyses appropriate (including adjustment for baseline differences, clustering, multi‐arm design, and confounders)?	1. Were the results reported in sufficient detail for all important outcomes and all groups?	1. Was the trial’s setting and participants adequately described so that findings are applicable to similar contexts?	1. Were the observed effects plausible and interpreted appropriately (including limitations discussed)?	overall appraisal?	Risk of bias
31	Hassan B, et al, 2018	yes	unclear	unclear	unclear	no	unclear	yes	unclear	yes	yes	yes	include	low-moderate

## Sheet: Non RCT
citation	study	is it clear what is the ‘cause’ and what is the ‘effect’?	Were the participants included in any comparisons similar at the start of the study?	Were the participants included in any comparisons receiving similar treatment/care, other than the intervention?	Was there a control group?	Were there multiple measurements of the outcome both pre and post the intervention/exposure?	Was follow-up complete and if not, were differences between groups in terms of follow-up adequately described and analyzed?	Were the outcomes of participants included in any comparisons measured in the same way?	Were outcomes measured in a reliable way?	Was appropriate statistical analysis used?	Was the study design appropriate for the research question?	overall appraisal	Risk of bias
25	Grijalva-Eternod CS, et al 2018	yes	no	unclear	yes	yes	no	yes	yes	yes	yes	include	low-moderate

## Sheet: Non R prospective cohort
Citation	Study	Were the two groups similar and recruited from the same population?	Were the exposures measured similarly to assign people to both exposed and unexposed groups?	Was the exposure measured in a valid and reliable way?	Were confounding factors identified?	Were strategies to deal with confounding factors stated?	Were the groups/participants free of the outcome at the start of the study (or at the moment of exposure)?	Were the outcomes measured in a valid and reliable way?	Was the follow up time reported and sufficient to be long enough for outcomes to occur?	Was follow up complete, and if not, were the reasons to loss to follow up described and explored?	Were strategies to address incomplete follow up utilized?	Was appropriate statistical analysis used?	Overall appraisal	risk of bias
26	Doocy S.et al, January 2020	no	yes	yes	yes	yes	no	yes	yes	yes	yes	yes	include	low-moderate
32	Doocy S.et al, April,2020	yes	yes	yes	yes	yes	yes	yes	yes	yes	yes	yes	include	low-moderate

## Sheet: Qualitative studies
citattion	study	Is there congruity between the stated philosophical perspective and the research methodology?	Is there congruity between the research methodology and the research question or objectives?	Is there congruity between the research methodology and the methods used to collect data?	Is there congruity between the research methodology and the representation and analysis of data?	Is there congruity between the research methodology and the interpretation of results?	Is there a statement locating the researcher culturally or theoretically?	Is the influence of the researcher on the research, and vice- versa, addressed?	Are participants, and their voices, adequately represented?	Is the research ethical according to current criteria or, for recent studies, and is there evidence of ethical approval by an appropriate body?	Do the conclusions drawn in the research report flow from the analysis, or interpretation, of the data?	overall appraisal	Risk of bias
33	Muriithi N,2018	no	yes	yes	unclear	yes	no	no	unclear	no	yes	include	high
35	Bliznashka L, et al, 2024	unclear	yes	yes	unclear	yes	no	no	unclear	unclear	yes	include	high
